# Supplementary material
Source: publisher figshare collection journal article supplement (https://springernature.figshare.com/ndownloader/files/27530969)
Supplement: Supplementary file 1 [file 27530969]

## Sheet: Survey
This survey will identify the 'success factors' in your organisation to successfully deliver green infrastructure. Choose the response by clicking the 'please select a response' cell and selecting the answer that most closely reflects your experience. You can use the comments to add any additional details or specifics if you would like to. Review your results in the purple tab below. Please ensur…
Stable political and executive support
How strongly do executives support the use of NBS in your city?	(Please select a response)	(Add any comments here)
How strongly do your politicians support the use of NBS in your city?	(Please select a response)	(Add any comments here)
If your executive or political leaders changed, for example due to an election or a retirement, do you think you'd still have support?	(Please select a response)	(Add any comments here)
Suitable internal processes/standards/regulations/policy
If you want to implement a new NBS, is there a clear, documented process of approvals you should follow?	(Please select a response)	(Add any comments here)
Do you have transparent design or engineering standards to help guide your implementation of NBS?	(Please select a response)	(Add any comments here)
Do you have regulations/laws that make it more difficult to implement NBS?	(Please select a response)	(Add any comments here)
Do you have Council policies or strategies that are already supportive of NBS?	(Please select a response)	(Add any comments here)
Staff have time and motivation
Does your team have sufficient people to manage a significant new program of NBS implementation?	(Please select a response)	(Add any comments here)
Does your team have good morale to take on challenging new work?	(Please select a response)	(Add any comments here)
Do you get enough time to complete your projects?	(Please select a response)	(Add any comments here)
Do you have one or more project champions who promote NBS actively inside and outside the organisation?	(Please select a response)	(Add any comments here)
Advanced community engagement skills
When you have a project or design to deliver, how do you involve the community?	(Please select a response)	(Add any comments here)
If you were to involve the community more actively in project decisions, would that be supported by your organisation?	(Please select a response)	(Add any comments here)
Do you have people in your organisation with existing relationships to the community?	(Please select a response)	(Add any comments here)
Do you have people in your organisation that could guide you in best practices for engaging with the community?	(Please select a response)	(Add any comments here)
Do you have any familiarity working with private property/building owners?	(Please select a response)	(Add any comments here)
Alignment of internal departments and disciplines
How strongly does your engineering department support the idea of NBS?	(Please select a response)	(Add any comments here)
How strongly does your design/architecture department support the idea of NBS?	(Please select a response)	(Add any comments here)
How strongly does your maintenance department support the idea of NBS?	(Please select a response)	(Add any comments here)
Do you consider there are other teams within the organisation with significant power to undermine or delay NBS delivery?	(Please select a response)	(Add any comments here)
Culture of innovation and risk tolerance
How does your team respond when the organisation does something new and challenging?	(Please select a response)	(Add any comments here)
When a new initiative fails or is difficult, how does the organisation tend to respond?	(Please select a response)	(Add any comments here)
When a design creates new risks or takes something away from an existing urban function (e.g. traffic, parking), how does the organisation respond?	(Please select a response)	(Add any comments here)
Supportive departments in other levels of government
If you proceed with a range of new NBS, do you expect you may require approvals from other levels of government, for example relating to roads, heritage or waterways?	(Please select a response)	(Add any comments here)
If you do require these approvals, do you see a clear process to secure these approvals or would you need to negotiate?	(Please select a response)	(Add any comments here)
Do the key other areas of government have policies that support NBS, or are they very focused on their own work?	(Please select a response)	(Add any comments here)
Do you have positive relationships with staff or executives in these important external agencies?	(Please select a response)	(Add any comments here)
Access to suitable technical skills
Do you have staff (or access to consultants) with skills in engineering for NBS?	(Please select a response)	(Add any comments here)
Do you have staff (or access to consultants) with skills in design for NBS?	(Please select a response)	(Add any comments here)
Do you have staff (or access to consultants) with technical knowledge of horticulture, substrates and plant selection?	(Please select a response)	(Add any comments here)
Do you have staff or contractors with skills in constructing and maintaining NBS?	(Please select a response)	(Add any comments here)

## Sheet: Results
This page shows results for your Success Factors. If you've answered every question, you should see scores below, as well as our estimates of how strong you are in each success factor. Our calculator is quite strict, so you may disagree with our calculator's score. If you do disagree strongly, you are free to override our calculator's score by putting in your own score. This will be used instead …
Success factors	Our calculator's score out of 10	Our estimate of your capability	Any critical issues	Your score out of 10 (if you disagree)	Approximate meaning of your score	Comment
Stable executive and political support	Please Complete Survey		No Critical Issues
Suitable internal processes/standards/regulations/policy	Please Complete Survey		No Critical Issues
Staff have time and motivation	Please Complete Survey		No Critical Issues
Advanced community engagement skills	Please Complete Survey		No Critical Issues
Alignment of internal departments	Please Complete Survey		No Critical Issues
Culture of innovation and risk tolerance	Please Complete Survey		No Critical Issues
Supportive departments in other level of government	Please Complete Survey		No Critical Issues
Access to suitable technical skills	Please Complete Survey		No Critical Issues

## Sheet: Results Calculator - Pt1
		Q1		Q2		Q3		Q4		Q5		Total
Success Factor results		Answer	Score	Answer	Score	Answer	Score	Answer	Score	Answer	Score		Ref	Critical issue 1	Critical issue 2	Critical issue 3	Critical issue 4
1	Stable executive and political support	(Please select a response)	Incomplete	(Please select a response)	Incomplete	(Please select a response)	Incomplete					#VALUE!	Stable executive and political support
2	Suitable internal processes/standards/regulations/policy	(Please select a response)	Incomplete	(Please select a response)	Incomplete	(Please select a response)	Incomplete	(Please select a response)	Incomplete			#VALUE!	Suitable internal processes/standards/regulations/policy
3	Staff have time and motivation	(Please select a response)	Incomplete	(Please select a response)	Incomplete	(Please select a response)	Incomplete	(Please select a response)	Incomplete			#VALUE!	Staff have time and motivation
4	Advanced community engagement skills	(Please select a response)	Incomplete	(Please select a response)	Incomplete	(Please select a response)	Incomplete	(Please select a response)	Incomplete	(Please select a response)	Incomplete	#VALUE!	Advanced community engagement skills
5	Alignment of internal departments	(Please select a response)	Incomplete	(Please select a response)	Incomplete	(Please select a response)	Incomplete	(Please select a response)	Incomplete			#VALUE!	Alignment of internal departments
6	Culture of innovation and risk tolerance	(Please select a response)	Incomplete	(Please select a response)	Incomplete	(Please select a response)	Incomplete					#VALUE!	Culture of innovation and risk tolerance
7	Supportive departments in other level of government	(Please select a response)	Incomplete	(Please select a response)	Incomplete	(Please select a response)	Incomplete	(Please select a response)	Incomplete			#VALUE!	Supportive departments in other level of government
8	Access to suitable technical skills	(Please select a response)	Incomplete	(Please select a response)	Incomplete	(Please select a response)	Incomplete	(Please select a response)	Incomplete			#VALUE!	Access to suitable technical skills

## Sheet: Step 3 Scoring
	Stable political and executive support	Incomplete	1	0.8	0.6	0.4	0.2
Mult	How strongly do key executive decisionmakers support the use of NBS in your city?	(Please select a response)	They understand the idea well and are strongly supportive	They have a basic understanding and give tentative support	They are not aware of the idea	Mixed support/opposition	They are currently unsupportive/opposed
Mult	How strongly do your politicians support the use of NBS in your city?	(Please select a response)	They understand the idea well and are strongly supportive	They have a basic understanding and give tentative support	They are not aware of the idea	Mixed support/opposition	They are currently unsupportive/opposed
Ad	If your executive or political leaders changed, for example due to an election or a retirement, do you think you'd still have support?	(Please select a response)	We are confident we'd retain or even gain support		We are not sure, it is possible we'd lose support	We are confident our level of support would reduce
	Suitable internal processes/standards/regulations/policy		10	8	6	4	2
Mult	If you want to implement a new NBS, is there a clear, documented process of approvals you should follow?	(Please select a response)	Yes, even for complex NBS	Yes, but only for basic NBS	No, we'd have to negotiate
Ad	Do you have transparent design or engineering standards to help guide your implementation of NBS?	(Please select a response)	Yes, even for complex NBS	Yes, but only for basic NBS	No, but we'd be able to establish standards	No, we don't have standards we can use and we can't establish these
Mult	Do you have regulations/laws that make it more difficult to implement NBS?	(Please select a response)	No, our legislation is supportive or neutral	Yes, but there are ways to work around them		Yes, and some are significant barriers
Ad	Does your organisation have policies or strategies that are already supportive of NBS?	(Please select a response)	Yes, our strategies have specific supportive measures (e.g. funds, targets)	Yes, a range of strategies outline general support	Limited policy/strategy touches on NBS in small sections	No supportive policy	Policy currently opposes use of NBS
	Staff have time and motivation		10	8	6	4	2
Mult	Does your team have sufficient people to guide a significant new program of NBS implementation?	(Please select a response)	Yes, we are well-resourced and management intends to allocate staff resources to carry out a NBS Plan	Yes, we have only a few staff but are able to rely on consulting expertise		No, we will need to carry this out with very few staff	No, our team is declining in size/capacity
Ad	Does your team have good morale to take on challenging new work?	(Please select a response)	Yes, we have good morale and are excited to proceed	Morale is neutral		We are quite overwhelmed/demoralised and a new challenge is intimidating
Ad	Do you get enough time to complete your projects?	(Please select a response)	Yes, we tend to have timeframes that reflect how long things take		We tend to be allocated too little time to complete projects but we make it work by shifting deadlines or bringing on extra resources	We tend to be allocated too little time for projects and this can be a serious problem
Mult	Do you have one or more project champions who promote NBS actively inside and outside the organisation?	(Please select a response)	Yes, we have active champions working already	No, but we have potential champions	No, and we don't expect to be carrying out the project with an individual champion
	Advanced community engagement skills		10	8	6	4	2
Ad	When you have a project or design to deliver, how do you involve the community?	(Please select a response)	We involve the community very early, and give them significant decision powers over the design	We engage with the community before we start design, to ensure the design objectives reflect their needs and interests	We complete our project designs, then present these for comment to allow minor changes or explanations before proceeding with works	We inform the community once works are scheduled, then proceed as planned without making changes.
Ad	If you were to involve the community more actively in project decisions, would that be supported by your organisation?	(Please select a response)	Yes, this is something our organisation actively promotes	We think so, but we'd have to argue it carefully	We would face significant opposition from some parts of the organisation
Ad	Do you have people in your organisation with existing relationships to the community in your project sites?	(Please select a response)	Yes, we know lots of community members in the project areas directly	Yes, we have multiple colleagues who work with the community closely already that can help us	No, we don't know this community
Ad	Do you have people in your organisation that could guide you in best practices for engaging with the community?	(Please select a response)	Yes, we have engagement specialists familiar in advanced community engagement techniques and planning	Yes, we have engagement specialists who mostly do basic engagement but would be willing to support more advanced engagements	No, but we are willing to seek advice from consultants	No, we're not sure how to access this kind of knowledge and we can't access consulting advice
Ad	Do you have any familiarity working with private property/building owners?	(Please select a response)	Yes, lots	A little bit	None
	Alignment of internal departments and disciplines		10	8	6	4	2
Mult	How strongly does your engineering departments support the idea of NBS?	(Please select a response)	They know about it and they support it strongly, actively contributing to solutions	They have basic knowledge and are tentatively supportive if risks are managed well	Basic knowledge but support is uncertain	No knowledge and uncertain support	Active opposition
Mult	How strongly does your design/architecture department support the idea of NBS?	(Please select a response)	They know about it and they support it strongly, actively contributing to solutions	They have basic knowledge and are tentatively supportive if risks are managed well	Basic knowledge but support is uncertain	No knowledge and uncertain support	Active opposition
Mult	How strongly does your maintenance department support the idea of NBS?	(Please select a response)	They know about it and they support it strongly, actively contributing to solutions	They have basic knowledge and are tentatively supportive if risks are managed well	Basic knowledge but support is uncertain	No knowledge and uncertain support	Active opposition
Mult	Do you consider there are other teams within the organisation with significant power to undermine or delay NBS delivery?	(Please select a response)	No, no others that we expect to oppose us	Yes, one difficult team we'll have to work on	Yes, multiple other teams that may block us
	Culture of innovation and risk tolerance		10	8	6	4	2
Ad	How does your organisation respond when your team does something new and different?	(Please select a response)	It is celebrated and other teams proactively offer support	It is received postively but with caution	It is mostly ignored but if other teams need to be involved they will enter negotiations on their role	The rest of the organisation is too busy to be interested and actively avoids getting involved	There is an active dislike for work that is new, risky or difficult
Ad	When a new initiative fails or is difficult, how do leaders and executives tend to respond?	(Please select a response)	"OK, the first attempt didn't work. Let's figure out how to do it better."		"That was worth a try but let's never do it again."		"We told you so. Doing that was a big mistake. You deserve a lot of trouble for this. "
Mult	When a design creates new risks or takes something away from an existing urban function (e.g. traffic, parking), how does the organisation respond?	(Please select a response)	It is accepted that tradeoffs are necessary to deliver a better outcome	Every tradeoff or risk must be negotiated, but it is possible to persuade colleagues to accept these.		There is a strong reluctance to take on any new risks, or to take anything away from anyone, even when it may be of net benefit to the community.
	Supportive departments in other levels of government		10	8	6	4	2
Ad	If you proceed with a range of new NBS, do you expect you may require approvals from other levels of government, for example relating to roads, heritage or waterways?	(Please select a response)	No, we don't expect to need approvals from outside our organisation	Maybe one or two approvals	Yes, multiple approvals
Mult	If you do require these approvals, do you see a clear process to secure these approvals or would you need to negotiate?	(Please select a response)	Yes, processes are transparent and efficient	No, you need to just approach the organisation and negotiate, but that has worked well before.	Yes, but processes are slow and uncertain	No, we don't know the process and we have been opposed in past.
Ad	Do the key other areas of government have policies that support NBS, or are they very focused on their own work?	(Please select a response)	Yes, there is good policy integration and broad support for NBS	Some support at broad policy level but not always within approval agencies	No, each agency is narrowly focused on its deliverables
Ad	Do you have positive relationships with staff or executives in these important external agencies?	(Please select a response)	Yes, good relationships exist already	No, but we have ways of getting introductions to supportive people	No, we don't know who to go to	No, we have bad relationships due to past conflicts
	Access to suitable technical skills		10	8	6	4	2
Mult	Do you have staff (or access to consultants) with skills in engineering for NBS?	(Please select a response)	Yes, we already have people with experience delivering NBS	Yes, but we haven't worked with them on NBS yet	No, but we have people with related skills who are willing to take on the new challenge and upskill as necessary	No, we don't have any access to people with these skills.
Mult	Do you have staff (or access to consultants) with skills in design for NBS?	(Please select a response)	Yes, we already have people with experience delivering NBS	Yes, but we haven't worked with them on NBS yet	No, but we have people with related skills who are willing to take on the new challenge and upskill as necessary	No, we don't have any access to people with these skills.
Mult	Do you have staff (or access to consultants) with technical knowledge of horticulture, substrates and plant selection?	(Please select a response)	Yes, we already have people with experience delivering NBS	Yes, but we haven't worked with them on NBS yet	No, but we have people with related skills who are willing to take on the new challenge and upskill as necessary	No, we don't have any access to people with these skills.
Mult	Do you have staff or contractors with skills in constructing and maintaining NBS?	(Please select a response)	Yes, we already have people with experience delivering NBS	Yes, but we haven't worked with them on NBS yet	No, but we have people with related skills who are willing to take on the new challenge and upskill as necessary	No, we don't have any access to people with these skills.

## Sheet: Step 3 Question Options
Stable political and executive support	Incomplete	1	0.8	0.6	0.4	0.2	0	0	0	0	0	0	0	0	0	0	0	0	0	0	0	0	0	0	0	0
How strongly do key executive decisionmakers support the use of NBS in your city?	(Please select a response)	They understand the idea well and are strongly supportive	They have a basic understanding and give tentative support	They are not aware of the idea	Mixed support/opposition	They are currently unsupportive/opposed	0	0	0	0	0	0	0	0	0	0	0	0	0	0	0	0	0	0	0	0
How strongly do your politicians support the use of NBS in your city?	(Please select a response)	They understand the idea well and are strongly supportive	They have a basic understanding and give tentative support	They are not aware of the idea	Mixed support/opposition	They are currently unsupportive/opposed	0	0	0	0	0	0	0	0	0	0	0	0	0	0	0	0	0	0	0	0
If your executive or political leaders changed, for example due to an election or a retirement, do you think you'd still have support?	(Please select a response)	We are confident we'd retain or even gain support	We are not sure, it is possible we'd lose support	We are confident our level of support would reduce		0	0	0	0	0	0	0	0	0	0	0	0	0	0	0	0	0	0	0	0	0
0	0	0	0	0	0	0	0	0	0	0	0	0	0	0	0	0	0	0	0	0	0	0	0	0	0	0
Suitable internal processes/standards/regulations/policy	0	10	8	6	4	2	0	0	0	0	0	0	0	0	0	0	0	0	0	0	0	0	0	0	0	0
If you want to implement a new NBS, is there a clear, documented process of approvals you should follow?	(Please select a response)	Yes, even for complex NBS	Yes, but only for basic NBS	No, we'd have to negotiate	0	0	0	0	0	0	0	0	0	0	0	0	0	0	0	0	0	0	0	0	0	0
Do you have transparent design or engineering standards to help guide your implementation of NBS?	(Please select a response)	Yes, even for complex NBS	Yes, but only for basic NBS	No, but we'd be able to establish standards	No, we don't have standards we can use and we can't establish these	0	0	0	0	0	0	0	0	0	0	0	0	0	0	0	0	0	0	0	0	0
Do you have regulations/laws that make it more difficult to implement NBS?	(Please select a response)	No, our legislation is supportive or neutral	Yes, but there are ways to work around them	Yes, and some are significant barriers		0	0	0	0	0	0	0	0	0	0	0	0	0	0	0	0	0	0	0	0	0
Does your organisation have policies or strategies that are already supportive of NBS?	(Please select a response)	Yes, our strategies have specific supportive measures (e.g. funds, targets)	Yes, a range of strategies outline general support	Limited policy/strategy touches on NBS in small sections	No supportive policy	Policy currently opposes use of NBS	0	0	0	0	0	0	0	0	0	0	0	0	0	0	0	0	0	0	0	0
0	0	0	0	0	0	0	0	0	0	0	0	0	0	0	0	0	0	0	0	0	0	0	0	0	0	0
Staff have time and motivation	0	10	8	6	4	2	0	0	0	0	0	0	0	0	0	0	0	0	0	0	0	0	0	0	0	0
Does your team have sufficient people to guide a significant new program of NBS implementation?	(Please select a response)	Yes, we are well-resourced and management intends to allocate staff resources to carry out a NBS Plan	Yes, we have only a few staff but are able to rely on consulting expertise	No, we will need to carry this out with very few staff	No, our team is declining in size/capacity		0	0	0	0	0	0	0	0	0	0	0	0	0	0	0	0	0	0	0	0
Does your team have good morale to take on challenging new work?	(Please select a response)	Yes, we have good morale and are excited to proceed	Morale is neutral	We are quite overwhelmed/demoralised and a new challenge is intimidating		0	0	0	0	0	0	0	0	0	0	0	0	0	0	0	0	0	0	0	0	0
Do you get enough time to complete your projects?	(Please select a response)	Yes, we tend to have timeframes that reflect how long things take	We tend to be allocated too little time to complete projects but we make it work by shifting deadlines or bringing on extra resources	We tend to be allocated too little time for projects and this can be a serious problem		0	0	0	0	0	0	0	0	0	0	0	0	0	0	0	0	0	0	0	0	0
Do you have one or more project champions who promote NBS actively inside and outside the organisation?	(Please select a response)	Yes, we have active champions working already	No, but we have potential champions	No, and we don't expect to be carrying out the project with an individual champion	0	0	0	0	0	0	0	0	0	0	0	0	0	0	0	0	0	0	0	0	0	0
0	0	0	0	0	0	0	0	0	0	0	0	0	0	0	0	0	0	0	0	0	0	0	0	0	0	0
Advanced community engagement skills	0	10	8	6	4	2	0	0	0	0	0	0	0	0	0	0	0	0	0	0	0	0	0	0	0	0
When you have a project or design to deliver, how do you involve the community?	(Please select a response)	We involve the community very early, and give them significant decision powers over the design	We engage with the community before we start design, to ensure the design objectives reflect their needs and interests	We complete our project designs, then present these for comment to allow minor changes or explanations before proceeding with works	We inform the community once works are scheduled, then proceed as planned without making changes.	0	0	0	0	0	0	0	0	0	0	0	0	0	0	0	0	0	0	0	0	0
If you were to involve the community more actively in project decisions, would that be supported by your organisation?	(Please select a response)	Yes, this is something our organisation actively promotes	We think so, but we'd have to argue it carefully	We would face significant opposition from some parts of the organisation	0	0	0	0	0	0	0	0	0	0	0	0	0	0	0	0	0	0	0	0	0	0
Do you have people in your organisation with existing relationships to the community in your project sites?	(Please select a response)	Yes, we know lots of community members in the project areas directly	Yes, we have multiple colleagues who work with the community closely already that can help us	No, we don't know this community	0	0	0	0	0	0	0	0	0	0	0	0	0	0	0	0	0	0	0	0	0	0
Do you have people in your organisation that could guide you in best practices for engaging with the community?	(Please select a response)	Yes, we have engagement specialists familiar in advanced community engagement techniques and planning	Yes, we have engagement specialists who mostly do basic engagement but would be willing to support more advanced engagements	No, but we are willing to seek advice from consultants	No, we're not sure how to access this kind of knowledge and we can't access consulting advice	0	0	0	0	0	0	0	0	0	0	0	0	0	0	0	0	0	0	0	0	0
Do you have any familiarity working with private property/building owners?	(Please select a response)	Yes, lots	A little bit	None	0	0	0	0	0	0	0	0	0	0	0	0	0	0	0	0	0	0	0	0	0	0
0	0	0	0	0	0	0	0	0	0	0	0	0	0	0	0	0	0	0	0	0	0	0	0	0	0	0
Alignment of internal departments and disciplines	0	10	8	6	4	2	0	0	0	0	0	0	0	0	0	0	0	0	0	0	0	0	0	0	0	0
How strongly does your engineering departments support the idea of NBS?	(Please select a response)	They know about it and they support it strongly, actively contributing to solutions	They have basic knowledge and are tentatively supportive if risks are managed well	Basic knowledge but support is uncertain	No knowledge and uncertain support	Active opposition	0	0	0	0	0	0	0	0	0	0	0	0	0	0	0	0	0	0	0	0
How strongly does your design/architecture department support the idea of NBS?	(Please select a response)	They know about it and they support it strongly, actively contributing to solutions	They have basic knowledge and are tentatively supportive if risks are managed well	Basic knowledge but support is uncertain	No knowledge and uncertain support	Active opposition	0	0	0	0	0	0	0	0	0	0	0	0	0	0	0	0	0	0	0	0
How strongly does your maintenance department support the idea of NBS?	(Please select a response)	They know about it and they support it strongly, actively contributing to solutions	They have basic knowledge and are tentatively supportive if risks are managed well	Basic knowledge but support is uncertain	No knowledge and uncertain support	Active opposition	0	0	0	0	0	0	0	0	0	0	0	0	0	0	0	0	0	0	0	0
Do you consider there are other teams within the organisation with significant power to undermine or delay NBS delivery?	(Please select a response)	No, no others that we expect to oppose us	Yes, one difficult team we'll have to work on	Yes, multiple other teams that may block us	0	0	0	0	0	0	0	0	0	0	0	0	0	0	0	0	0	0	0	0	0	0
0	0	0	0	0	0	0	0	0	0	0	0	0	0	0	0	0	0	0	0	0	0	0	0	0	0	0
Culture of innovation and risk tolerance	0	10	8	6	4	2	0	0	0	0	0	0	0	0	0	0	0	0	0	0	0	0	0	0	0	0
How does your organisation respond when your team does something new and different?	(Please select a response)	It is celebrated and other teams proactively offer support	It is received postively but with caution	It is mostly ignored but if other teams need to be involved they will enter negotiations on their role	The rest of the organisation is too busy to be interested and actively avoids getting involved	There is an active dislike for work that is new, risky or difficult	0	0	0	0	0	0	0	0	0	0	0	0	0	0	0	0	0	0	0	0
When a new initiative fails or is difficult, how do leaders and executives tend to respond?	(Please select a response)	"OK, the first attempt didn't work. Let's figure out how to do it better."	"That was worth a try but let's never do it again."	Do you get enough time to complete your projects?			0	0	0	0	0	0	0	0	0	0	0	0	0	0	0	0	0	0	0	0
When a design creates new risks or takes something away from an existing urban function (e.g. traffic, parking), how does the organisation respond?	(Please select a response)	It is accepted that tradeoffs are necessary to deliver a better outcome	Every tradeoff or risk must be negotiated, but it is possible to persuade colleagues to accept these.	There is a strong reluctance to take on any new risks, or to take anything away from anyone, even when it may be of net benefit to the community.		0	0	0	0	0	0	0	0	0	0	0	0	0	0	0	0	0	0	0	0	0
0	0	0	0	0	0	0	0	0	0	0	0	0	0	0	0	0	0	0	0	0	0	0	0	0	0	0
Supportive departments in other levels of government	0	10	8	6	4	2	0	0	0	0	0	0	0	0	0	0	0	0	0	0	0	0	0	0	0	0
If you proceed with a range of new NBS, do you expect you may require approvals from other levels of government, for example relating to roads, heritage or waterways?	(Please select a response)	No, we don't expect to need approvals from outside our organisation	Maybe one or two approvals	Yes, multiple approvals	0	0	0	0	0	0	0	0	0	0	0	0	0	0	0	0	0	0	0	0	0	0
If you do require these approvals, do you see a clear process to secure these approvals or would you need to negotiate?	(Please select a response)	Yes, processes are transparent and efficient	No, you need to just approach the organisation and negotiate, but that has worked well before.	Yes, but processes are slow and uncertain	No, we don't know the process and we have been opposed in past.	0	0	0	0	0	0	0	0	0	0	0	0	0	0	0	0	0	0	0	0	0
Do the key other areas of government have policies that support NBS, or are they very focused on their own work?	(Please select a response)	Yes, there is good policy integration and broad support for NBS	Some support at broad policy level but not always within approval agencies	No, each agency is narrowly focused on its deliverables	0	0	0	0	0	0	0	0	0	0	0	0	0	0	0	0	0	0	0	0	0	0
Do you have positive relationships with staff or executives in these important external agencies?	(Please select a response)	Yes, good relationships exist already	No, but we have ways of getting introductions to supportive people	No, we don't know who to go to	No, we have bad relationships due to past conflicts	0	0	0	0	0	0	0	0	0	0	0	0	0	0	0	0	0	0	0	0	0
0	0	0	0	0	0	0	0	0	0	0	0	0	0	0	0	0	0	0	0	0	0	0	0	0	0	0
Access to suitable technical skills	0	10	8	6	4	2	0	0	0	0	0	0	0	0	0	0	0	0	0	0	0	0	0	0	0	0
Do you have staff (or access to consultants) with skills in engineering for NBS?	(Please select a response)	Yes, we already have people with experience delivering NBS	Yes, but we haven't worked with them on NBS yet	No, but we have people with related skills who are willing to take on the new challenge and upskill as necessary	No, we don't have any access to people with these skills.	0	0	0	0	0	0	0	0	0	0	0	0	0	0	0	0	0	0	0	0	0
Do you have staff (or access to consultants) with skills in design for NBS?	(Please select a response)	Yes, we already have people with experience delivering NBS	Yes, but we haven't worked with them on NBS yet	No, but we have people with related skills who are willing to take on the new challenge and upskill as necessary	No, we don't have any access to people with these skills.	0	0	0	0	0	0	0	0	0	0	0	0	0	0	0	0	0	0	0	0	0
Do you have staff (or access to consultants) with technical knowledge of horticulture, substrates and plant selection?	(Please select a response)	Yes, we already have people with experience delivering NBS	Yes, but we haven't worked with them on NBS yet	No, but we have people with related skills who are willing to take on the new challenge and upskill as necessary	No, we don't have any access to people with these skills.	0	0	0	0	0	0	0	0	0	0	0	0	0	0	0	0	0	0	0	0	0
Do you have staff or contractors with skills in constructing and maintaining NBS?	(Please select a response)	Yes, we already have people with experience delivering NBS	Yes, but we haven't worked with them on NBS yet	No, but we have people with related skills who are willing to take on the new challenge and upskill as necessary	No, we don't have any access to people with these skills.	0	0	0	0	0	0	0	0	0	0	0	0	0	0	0	0	0	0	0	0	0
